# Supplementary material for: Hydroethanolic Extract from Bridelia atroviridis Müll. Arg. Bark Improves Haematological and Biochemical Parameters in Nicotinamide‐/Streptozotocin‐Induced Diabetic Rats
Source: Hindawi journal article supplement (doi:10.1155/2020/3160834), 2020-01-01
Supplement: f1 [file 3160834.f1.pdf]

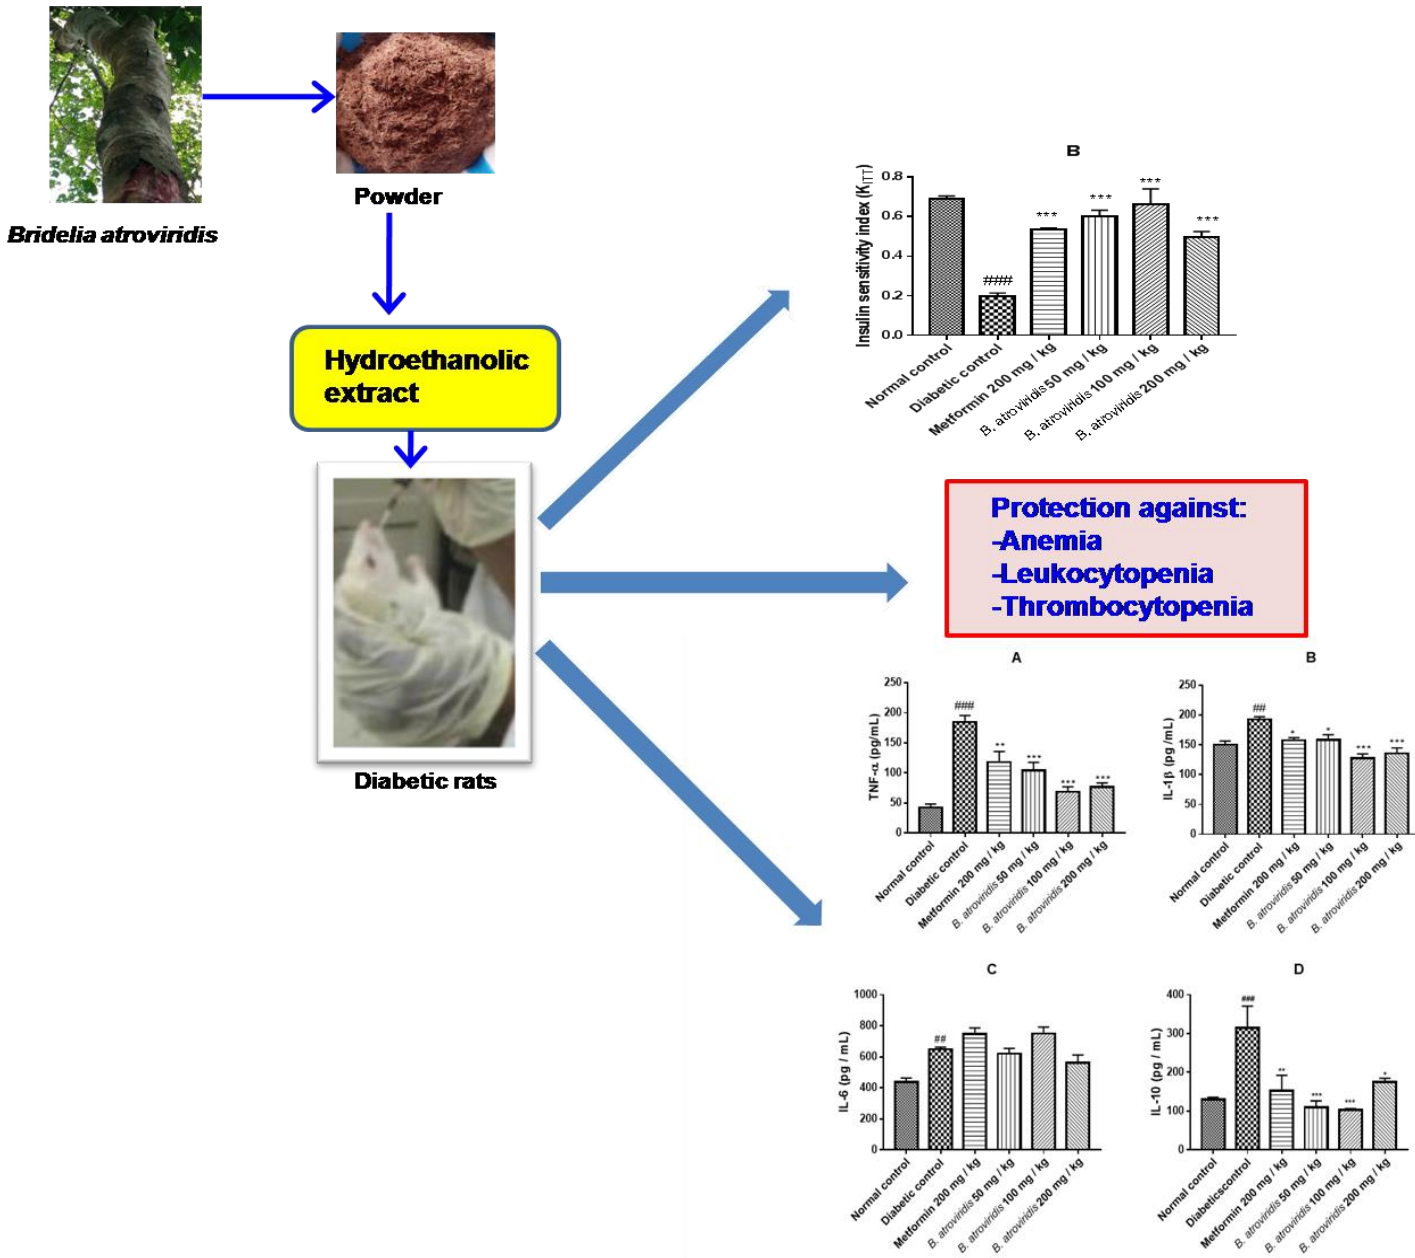

**Fig S1:** Effects of hydro-ethanolic extract from *Bridelia atroviridis* bark on haematological and biochemical parameters in nicotinamide/streptozotocin-induced diabetic rats.

The administration of the hydro-ethanolic extract from *Bridelia atroviridis* (Euphorbiaceae) to nicotinamide/streptozotocin-induced diabetic rats improves blood glucose levels confirmed by the increase of K<sub>ITT</sub> value; prevents from anemia, leukocytopenia and thrombocytopenia. The extract also exhibits significant regulation in the cytokines imbalance induced in diabetic conditions.
